# Supplementary material for: Oxidative Stress in Cardiac Tissue of Patients Undergoing Coronary Artery Bypass Graft Surgery: The Effects of Overweight and Obesity
Source: Hindawi journal article supplement (doi:10.1155/2018/6598326), 2018-01-01
Supplement: f1 [file 6598326.f1.pdf]

## **Online data supplement**

### **Oxidative stress in patients undergoing coronary artery bypass graft surgery: the effects of overweight and obesity**

Yves Gramlich<sup>1</sup>, Andreas Daiber<sup>1</sup>, Katja Buschmann<sup>2</sup>, Matthias Oelze<sup>1</sup>, Christian-Friedrich Vahl<sup>2</sup>, Thomas Münzel<sup>1</sup> and Ulrich Hink<sup>1</sup>

<sup>1</sup> Center for Cardiology, Cardiology 1, University Medical Center Mainz, Germany. <sup>2</sup>  
Clinic of Thoracic  
and Cardiovascular Surgery, University Medical Center Mainz, Germany

**Supplemental Table S1. Patient inclusion and exclusion criteria.****Inclusion criteria**

- First-time bypass surgery
- Consent of the patient for surgery, as well as for research projects such as the ethics application (IRB approval 837.104.08 (6101))
- Personal signature on the study information sheet

**Exclusion criteria**

- Rejection by patient
- Mentally ill patients or patients who have had a guardian care
- Rejection by surgeon
- "off-pump" operations
- Bypass Revision (so-called. RE-ACB)
- Requiring valvular surgery
- Pre-existing conditions of the rheumatic diseases
- Condition for any transplant
- Infectious diseases (HIV, Hepatitis, O.A.)
- Emergency surgery

**Supplemental Table S2. Patient characteristics.**

|                                   |         | BMI < 25<br>kg/m <sup>2</sup> | BMI 25-30<br>kg/m <sup>2</sup> | BMI > 30<br>kg/m <sup>2</sup> | Total   |
|-----------------------------------|---------|-------------------------------|--------------------------------|-------------------------------|---------|
| Patients                          | n       | 19                            | 25                             | 17                            | 61      |
|                                   | %       | 31,10%                        | 41,00%                         | 27,90%                        | 100,00% |
| Diabetes Mellitus<br>(IDDM/NIDDM) | n       | 8                             | 3                              | 6                             | 17      |
|                                   | %       | 42,10%                        | 12,00%                         | 37,50%                        | 27,87%  |
| <b>Gender</b>                     |         |                               |                                |                               |         |
| Male                              | n       | 16                            | 18                             | 8                             | 42      |
|                                   | %       | 84,20%                        | 72,00%                         | 47,10%                        | 68,90%  |
| Female                            | n       | 3                             | 7                              | 9                             | 19      |
|                                   | %       | 15,80%                        | 28,00%                         | 52,90%                        | 31,10%  |
| Age                               | Min.    | 53                            | 46                             | 50                            | 46      |
|                                   | Max.    | 82                            | 81                             | 80                            | 82      |
|                                   | Average | 66,89                         | 68,32                          | 62,06                         | 66,13   |
|                                   | SEM     | 2,06                          | 1,93                           | 1,99                          | 1,19    |
| <b>Medication</b>                 |         |                               |                                |                               |         |
| ACE/AT1                           | n       | 4                             | 4                              | 2                             | 10      |
|                                   | %       | 21%                           | 16%                            | 12%                           | 16%     |
| Statin                            | n       | 13                            | 14                             | 10                            | 37      |
|                                   | %       | 68%                           | 56%                            | 59%                           | 61%     |
| Betablocker                       | n       | 11                            | 12                             | 13                            | 36      |
|                                   | %       | 58%                           | 48%                            | 76%                           | 59%     |
| Nitro                             | n       | 1                             | 2                              | 3                             | 6       |
|                                   | %       | 5%                            | 8%                             | 18%                           | 10%     |
| Spironolacton                     | n       | 1                             | 1                              | 0                             | 2       |
|                                   | %       | 5%                            | 4%                             | 0%                            | 3%      |
| Clopidogrel                       | n       | 2                             | 4                              | 6                             | 12      |
|                                   | %       | 11%                           | 16%                            | 35%                           | 20%     |
| ASS100                            | n       | 16                            | 18                             | 11                            | 45      |
|                                   | %       | 84%                           | 72%                            | 65%                           | 74%     |
| Hypertonie                        | n       | 10                            | 11                             | 12                            | 33      |
|                                   | %       | 53%                           | 44%                            | 71%                           | 54%     |
| <b>Stenosis</b>                   |         |                               |                                |                               |         |
| LAD                               | n       | 8                             | 11                             | 7                             | 26      |
|                                   | %       | 42%                           | 44%                            | 41%                           | 43%     |
| RCX                               | n       | 10                            | 10                             | 8                             | 28      |
|                                   | %       | 53%                           | 40%                            | 47%                           | 46%     |
| RCA                               | n       | 9                             | 10                             | 6                             | 25      |
|                                   | %       | 47%                           | 40%                            | 35%                           | 41%     |
| MS                                | n       | 2                             | 5                              | 1                             | 8       |
|                                   | %       | 11%                           | 20%                            | 6%                            | 13%     |
| <b>Lipid</b>                      |         |                               |                                |                               |         |
| HDL                               | Average | 37,05                         | 43,59                          | 31,17                         | 37,27   |
|                                   | Min     | 31,35                         | 22,88                          | 22,96                         | 25,73   |
|                                   | Max     | 41,80                         | 123,88                         | 53,64                         | 73,11   |
| LDL                               | Average | 90,88                         | 117,03                         | 112,52                        | 106,81  |
|                                   | Min     | 32,31                         | 190,00                         | 92,43                         | 104,91  |
|                                   | Max     | 179,23                        | 56,21                          | 136,56                        | 124,00  |
| TG                                | Average | 90,43                         | 129,09                         | 185,25                        | 134,92  |
|                                   | Min     | 41,00                         | 68,00                          | 118,00                        | 75,67   |
|                                   | Max     | 133,00                        | 245,00                         | 239,00                        | 205,67  |
| Cholesterin                       | Average | 136,71                        | 155,64                         | 154,00                        | 148,78  |
|                                   | Min     | 73,00                         | 88,00                          | 127,00                        | 96,00   |
|                                   | Max     | 255,00                        | 224,00                         | 184,00                        | 221,00  |
| LVEF                              | Average | 55,00                         | 60,00                          | 72,00                         | 62,33   |
|                                   | Min     | 46,00                         | 32,00                          | 60,00                         | 46,00   |
|                                   | Max     | 64,00                         | 83,00                          | 83,00                         | 76,67   |

**Supplemental Table S3. Details on used antibodies.**

|                      |  |  |  |  | kDa | Delution |
|----------------------|--|--|--|--|-----|----------|
|                      |  |  |  |  |     |          |
| Loading-Control:     |  |  |  |  |     |          |
|                      |  |  |  |  | 42  | 1:2500   |
|                      |  |  |  |  |     |          |
| NO synthase:         |  |  |  |  |     |          |
|                      |  |  |  |  | 140 | 1:1000   |
|                      |  |  |  |  | 140 | 1:1000   |
|                      |  |  |  |  | ~26 | 1:100    |
|                      |  |  |  |  | 21  | 1:500    |
|                      |  |  |  |  |     |          |
| NADPH oxidase:       |  |  |  |  |     |          |
|                      |  |  |  |  | ~60 | 1:100    |
|                      |  |  |  |  | 58  | 1:500    |
|                      |  |  |  |  | 47  | 1:250    |
|                      |  |  |  |  |     |          |
| Antioxidant enzymes: |  |  |  |  |     |          |
|                      |  |  |  |  | 31  | 1:250    |
|                      |  |  |  |  | 24  | 1 µg/ml  |
|                      |  |  |  |  | 16  | 1:1000   |
|                      |  |  |  |  |     |          |
| Others:              |  |  |  |  |     |          |
|                      |  |  |  |  | 52  | 1:2500   |
|                      |  |  |  |  | 150 | 1 :2000  |
|                      |  |  |  |  | 110 | 1:250    |

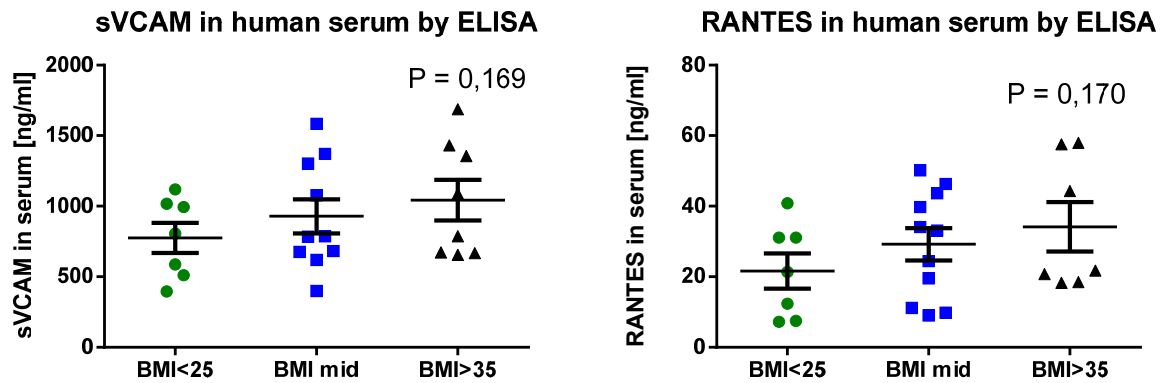

### Supplemental Figure S1. ELISA for sVCAM-1 and RANTES.

ELISA of sVCAM-1 and RANTES were performed in a subgroup of 26 patients. In accordance with higher cardiac tissue VCAM-1 expression in obese patients, the markers of pro-inflammatory state, sVCAM-1 and RANTES, were elevated by trend with increasing BMI. Quantikine ELISA Immunoassays were performed according to the manufacturer's instructions and were obtained from R&D Systems (human CCL5/RANTES and sVCAM-1).
